# Supplementary material for: A novel role for the tumour suppressor Nitrilase1 modulating the Wnt/β-catenin signalling pathway
Source: PubMed Central journal article supplement (PMC4860965; doi:10.1038/celldisc.2015.39), 2016-01-05
Supplement: celldisc201539-s1.pdf [file celldisc201539-s1.pdf]

**Supplementary Table 1. Primers used for plasmid generation**

| <b>Gene</b>                                         | <b>Primers</b> |                                                                |
|-----------------------------------------------------|----------------|----------------------------------------------------------------|
| hNit1<br>NM_005600.2                                | forward        | 5'-GCGGAATTCAGATCTGCCACCATGCTGGGCTT<br>CATCACCAGG-3'           |
|                                                     | reverse        | 5'-GCGCTCGAGAGATCTAGACAGTGGGTGACCCA<br>G-3'                    |
| mutagenesis of<br>endogenous<br>hNit1 BamHI<br>site | forward        | 5'-CTTACCTATCCTTCAGCTTTTGGCTCCATTACA<br>GGCCAGCCC-3'           |
|                                                     | reverse        | 5'-GGGCTGGGCCTGTAATGGAGCCAAAAGCTGA<br>AGGATAGGTAAG-3'          |
| hNit1<br>NM_001185094                               | forward        | 5'-GCGGGATCCGCCGCCATGGCTATCTCCTCTTC<br>C-3'                    |
| hNit1+stop                                          | reverse        | 5'-GCGGGATCCTTAAGACAGTGGGTGACCCAG-3'                           |
| hNit1-stop                                          | reverse        | 5'-GCGGGATCCAGACAGTGGGTGACCCAG-3'                              |
| hNit1ΔC+stop                                        | reverse        | 5'-GCGGGATCCTTACACAGGCAGGTGTCG-3'                              |
| hNit1ΔC-stop                                        | reverse        | 5'-GCGGGATCCCACAGGCAGGTGTCGGCG-3'                              |
| hNit1C203A<br>mutagenesis                           | forward        | 5'-GGCAAGATTGGTCTAGCTGTCGCCTATGACAT<br>GCGGTTCCCTGAA-3'        |
| hNit1C203A<br>mutagenesis                           | reverse        | 5'-G TTCAGGGAACCGCATGTCATAGGCGACAGC<br>TAGACCAATCTTGC-3'       |
| hNit1-<br>Drosophila<br>linker-hFhit                | reverse        | 5'-GCTGAACGACTGGGTTGGTTCCTTGCTGCGC<br>AGTGGGTGACCCAGATTGCC-3'  |
|                                                     | forward        | 5'-CGCAGCAAGGAACCAACCCAGTCGTTTCAGCTT<br>TGGCCAACATCTCATCAAG-3' |
| dNitFhit                                            | forward        | 5'-CGCGGATCCGCCGCCATGTCAACTCTAGTTAA<br>TACC-3'                 |
| dNitFhit+stop                                       | reverse        | 5'-CGCGGATCCCTAGCTTATGTCCGTCAG-3'                              |
| dNitFhit-stop                                       | reverse        | 5'-CGCGGATCCGCTTATGTCCGTCAGAAA-3'                              |
| dNit1-stop                                          | reverse        | 5'-GCGGGATCCTTAACGAAGGTTGTAGGCTGTTA<br>AG-3'                   |
| dFhit                                               | forward        | 5'-GCGGGATCCGCCGCCATGACCCAGGATCGAC<br>CATTG-3'                 |
| hTCF-4                                              | forward        | 5'-CGCGAATTCCATGCCGCAGCTGAACGGC-3'                             |
| □ΔNTCF-4                                            | forward        | 5'-CGCGAATTCCGAAAACCTCCTCGGCA-3'                               |

**Supplementary Table 2. Primers and UPL probes for qPCR**

| <b>Gene</b> | <b>Primers</b> |                            | <b>FAM dye-labeled Probe</b> |
|-------------|----------------|----------------------------|------------------------------|
| human Nit1  | forward        | 5'-CTGCGAATGGTTTTGGCTA-3'  | #9                           |
|             | reverse        | 5'-GGGACAGGAATCTGTGAGGA-3' |                              |
| human sp5   | forward        | 5'-GGGGAGACTCAGCAGACG-3'   | #36                          |
|             | reverse        | 5'-TGGGTCCCTATGTCCGAAG-3'  |                              |
| human GAPDH | forward        | 5'-AGCCACATCGCTCAGACAC-3'  | #60                          |
|             | reverse        | 5'-GCCCAATACGACCAAATCC-3'  |                              |

Details on the Universal Probe Library technology can be found at <http://www.roche-applied-science.com/shop/CategoryDisplay?catalogId=10001&tab=&identifier=Universal+Probe+Library#tab-0>
