# Supplementary material for: A novel role for the tumour suppressor Nitrilase1 modulating the Wnt/β-catenin signalling pathway
Source: PubMed Central journal article supplement (PMC4860965; doi:10.1038/celldisc.2015.39), 2016-01-05
Supplement: celldisc201539-s2.pdf [file celldisc201539-s2.pdf]

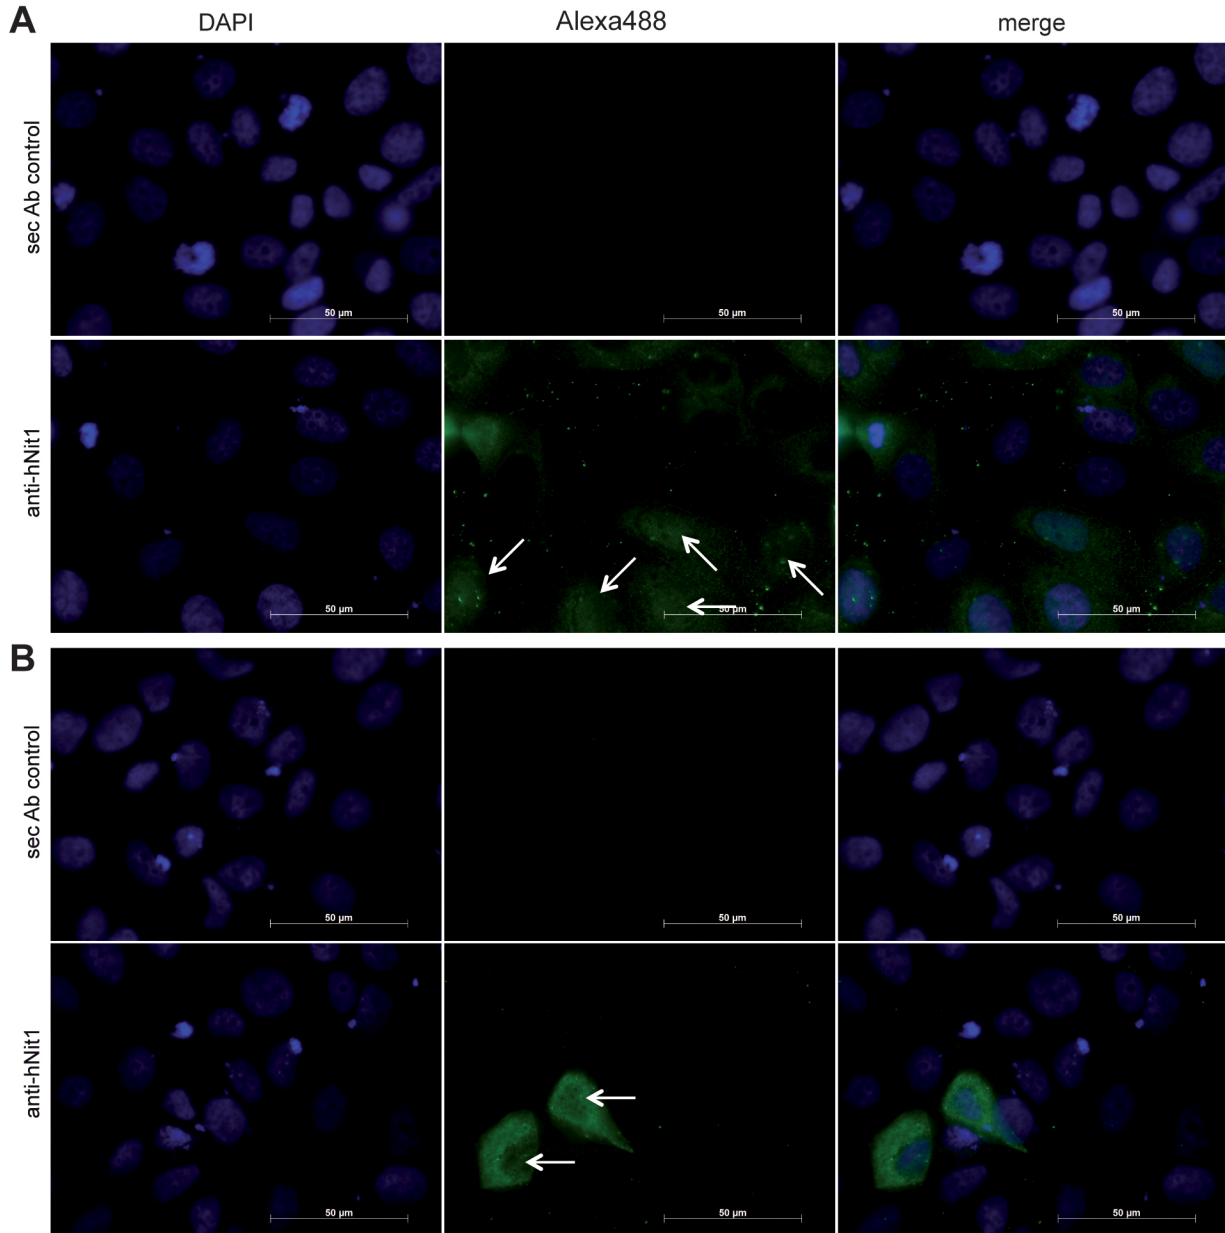

**Supplementary Figure S1:** A) MCF-7 cells were fixed in 3% formaldehyde and permeabilized with 0.5% (v/v) Triton X-100 and stained with anti-Nit1 antibody. Secondary antibody alone was used as a control. Cells with nuclear staining are marked with an arrow. B) MCF-7 cells were transiently transfected with hNit1 and stained as above. Exposure time was reduced compared to the images in A to specifically detect the overexpressed hNit1 which predominately localizes to the cytosol but also in the nuclei. The bar represents 50  $\mu\text{m}$ .

A

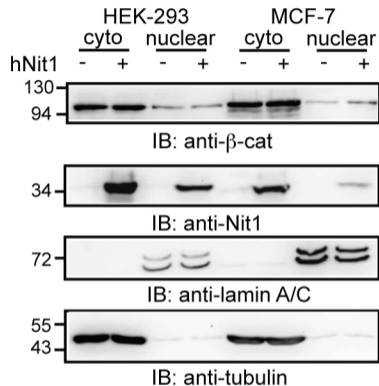

B

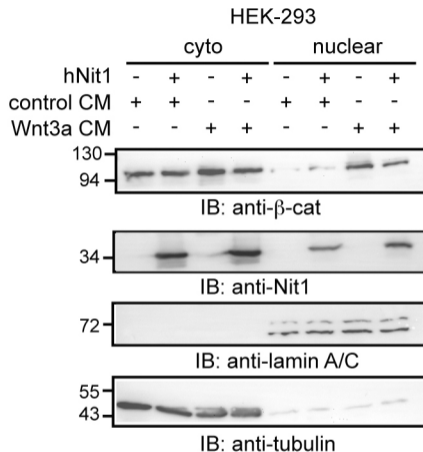

**Supplementary Figure S2:** A)  $\beta$ -Catenin distribution between cytosolic and nuclear fraction is not changed by overexpression of hNit in HEK-293 and MCF-7 cells. B) Stimulation of HEK-293 cells with Wnt3a-conditioned medium results in an increase of cytosolic and nuclear  $\beta$ -catenin. Transient transfection of hNit1 results in a reduced amount of nuclear  $\beta$ -catenin.

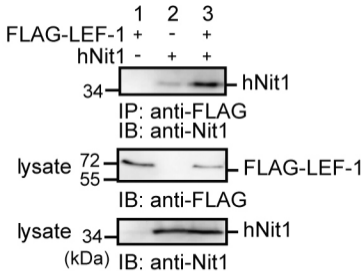

**Supplementary Figure S3:** Co-immunoprecipitation of hNit1 with FLAG-LEF-1 from lysates of transiently transfected HEK-293 cells.

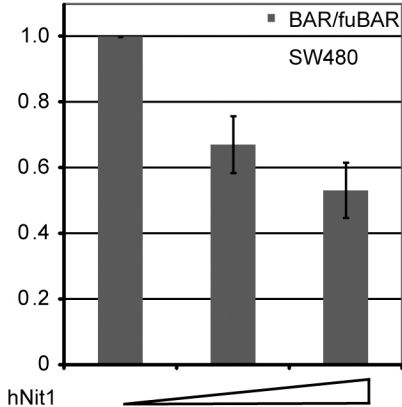

**Supplementary Figure S4:** Expression of hNit1 in SW480 colon carcinoma cells carrying an APC mutation resulting in constitutive active Wnt signalling induces a dose-dependent reduction of  $\beta$ -catenin transcriptional activity in BAR/fuBAR reporter gene assays (n=4).

|              | 1 | 2 | 3 | 4 |
|--------------|---|---|---|---|
| TCF-4        | - | + | + | + |
| $\beta$ -cat | - | + | + | + |
| hNit1        | - | - | + | - |
| hFhit        | - | - | + | - |
| hNit1-hFhit  | - | - | - | + |

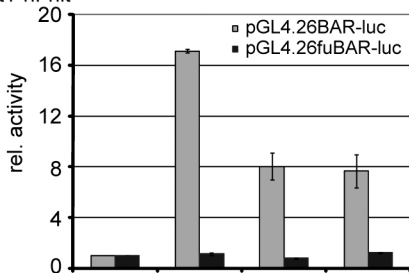

**Supplementary Figure S5:** An artificial hNit1-hFhit fusion protein exhibits similar repressive activity as co-transfection of the individual proteins in BARluc reporter gene assays in HEK-293 cells.

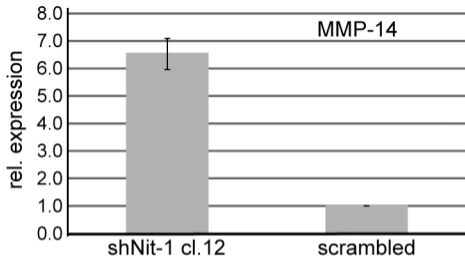

**Supplementary Figure S6:** Expression of the Wnt-target gene MMP-14 is upregulated in hNit1 knock-down MCF-7 cells as analysed by qRT-PCR (n= 8) and normalised to the scrambled clone.

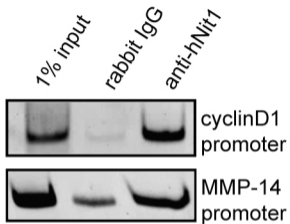

**Supplementary Figure S7:** HNit1 is recruited to the cyclin D1 and MMP-14 promoter. ChIP using anti-Nit-1 antibody was performed with HEK-293 cells. Rabbit IgG was used as a control.

**A**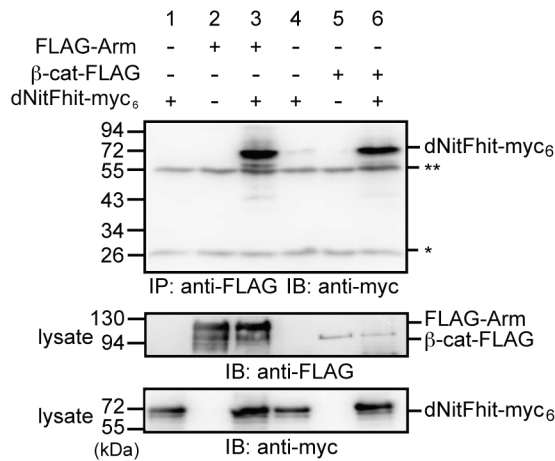**B**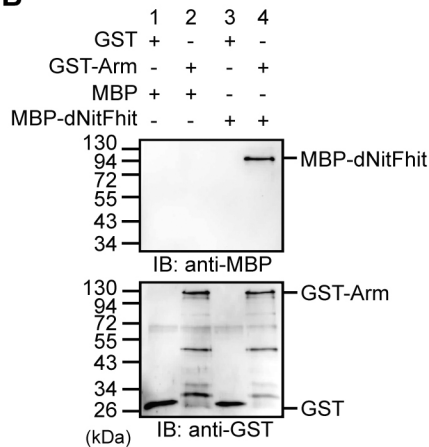**C**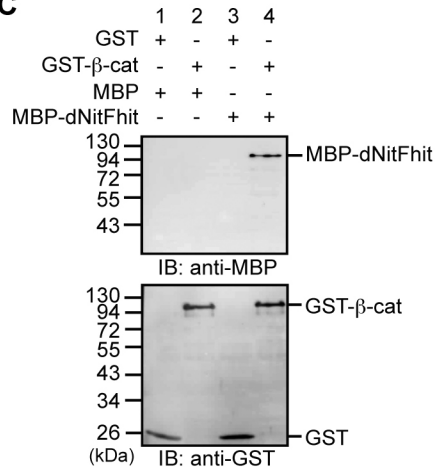**D**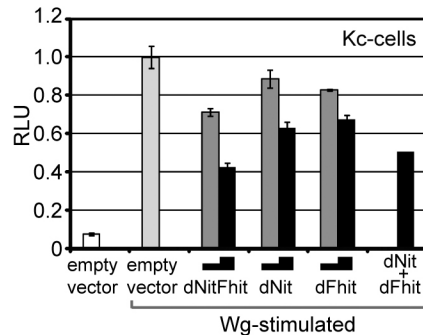**Supplementary Figure S8: DNitFhit binds to Armadillo and  $\beta$ -catenin and represses Wg-mediated transcription.**

(A) HEK-293 cells were transiently transfected with the indicated plasmids alone or in combination. Co-immunoprecipitation was performed with anti-FLAG M2 antibody and association of dNitFhit-myc<sub>6</sub> was analyzed by Western blotting. Lysate controls are shown. \*light chain, \*\*heavy chain of the precipitating antibody. (B and C) Armadillo and  $\beta$ -catenin directly interact with dNitFhit. Purified recombinant fusion proteins were incubated as indicated and protein complexes were pulled down with GSH-agarose beads. Precipitated protein complexes were analysed by Western blotting with anti-MBP and anti-GST antibodies. Representatives of at least 3 independent experiments are presented. (D) Dose-dependent repression of wingful-luciferase reporter gene activity. *Drosophila* Kc cells were transfected with two concentrations (110 ng: grey bars, or 220 ng: black bars) of expression vector encoding dNitFhit or its sub-fragments dNit and dFhit under the control of actin5 promoter as indicated. Cells were stimulated with Wg-conditioned or control medium 48 h after transfection for additional 24 h and luciferase activities were then measured in triplicate and normalised to Renilla-luc activity. The levels of Wg-stimulated cells parallel transfected by empty vector were set as 1 (100%), error bars represents standard deviations. Representative results are shown.
